# Supplementary material for: An immunogenomic signature for molecular classification in hepatocellular carcinoma
Source: PubMed Central journal article supplement (PMC8332372; doi:10.1016/j.omtn.2021.06.024), 2021-07-02
Supplement: mmc1.pdf [file mmc1.pdf]

**OMTN, Volume 25**

**Supplemental information**

**An immunogenomic signature for molecular  
classification in hepatocellular carcinoma**

**Weiwei Zhuang, Hongwei Sun, Shanshan Zhang, Yilin Zhou, Wanqing Weng, Boda Wu, Tingbo Ye, Weiguo Huang, Zhuo Lin, Liang Shi, and Keqing Shi**

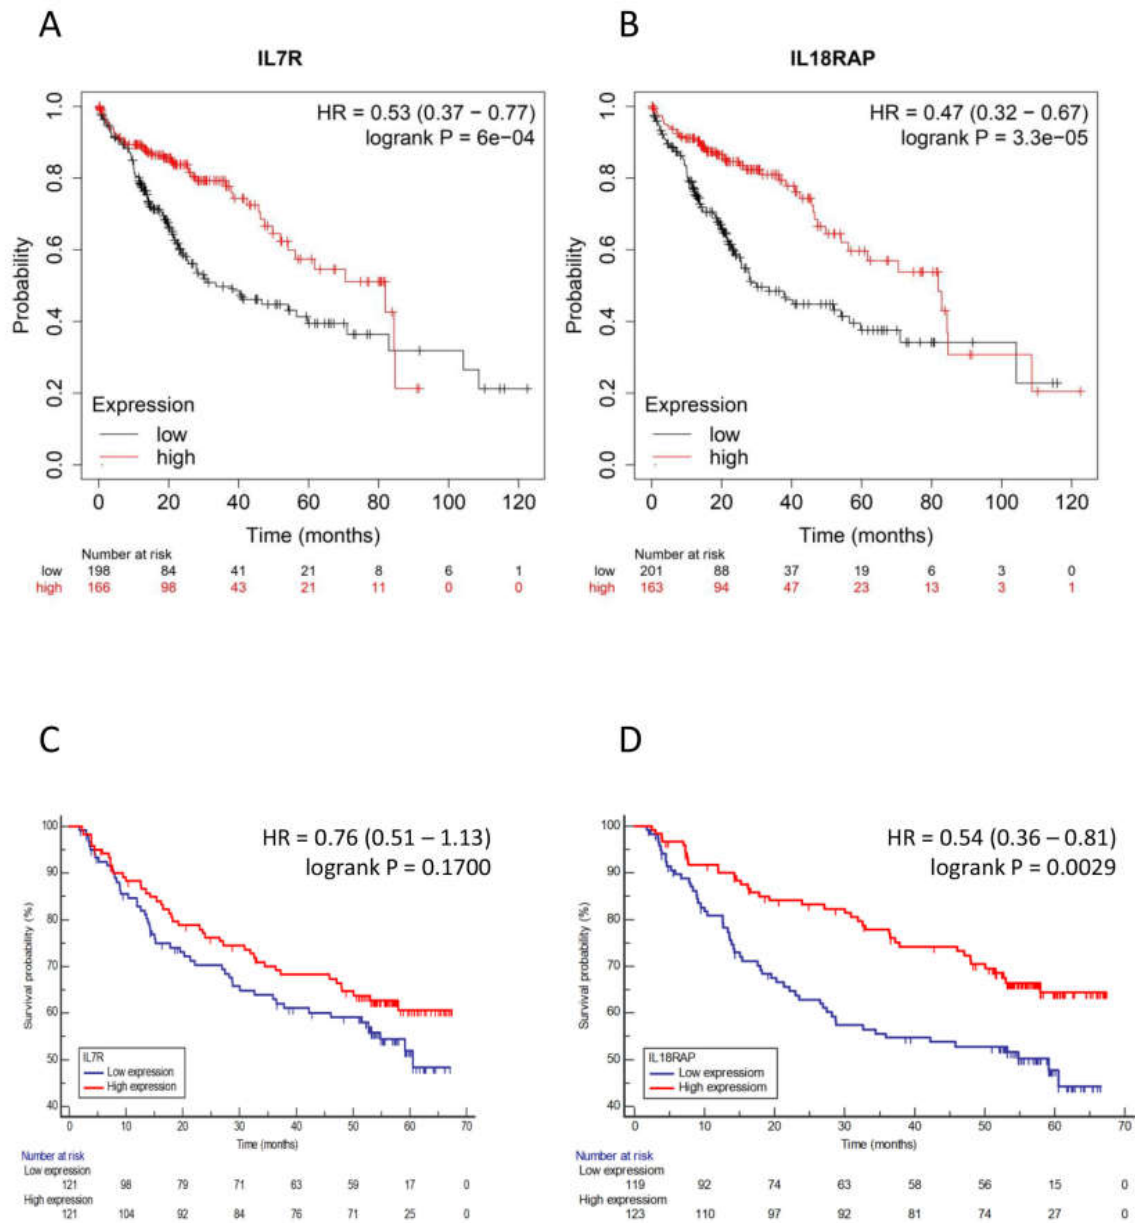

**Supplementary Figure 1. Cross-validation of IL7R and IL18RAP in prognosis of hepatocellular carcinoma using Kaplan-Meier Plotter and GEO (GSE 14520) databases.**

(A) IL7R in Kaplan-Meier Plotter databases; (B) IL18RAP in Kaplan-Meier Plotter databases; (C) IL7R in GSE 14520; (D) IL18RAP in GSE 14520

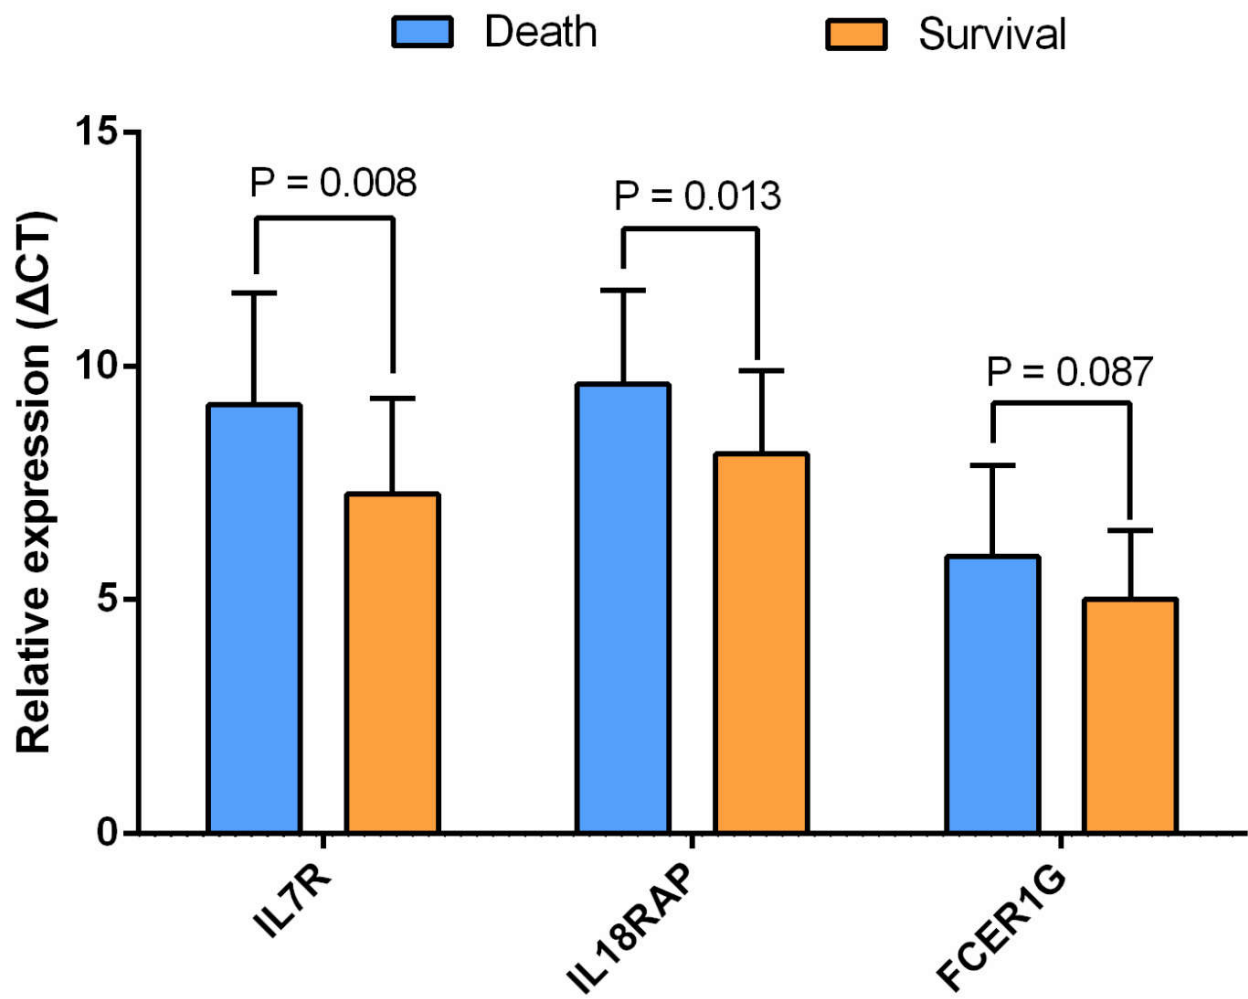

Supplementary Figure 2. The expression levels of IL7R and IL18RAP in randomly selected hepatocellular carcinoma samples.

**Table S1.** The clinicopathological characteristics of the three cohorts

| <b>Variables</b>                       | <b>Subgroups</b>  | <b>Development set (N=44)</b> |
|----------------------------------------|-------------------|-------------------------------|
| <b>Age</b>                             |                   |                               |
|                                        | <60               | 28                            |
|                                        | ≥60               | 16                            |
| <b>Gender</b>                          |                   |                               |
|                                        | Male              | 37                            |
|                                        | Female            | 7                             |
| <b>HBV infection</b>                   |                   |                               |
|                                        | Positive          | 31                            |
|                                        | Negative          | 13                            |
| <b>HCV infection</b>                   |                   |                               |
|                                        | Positive          | 0                             |
|                                        | Negative          | 44                            |
| <b>AFP</b>                             |                   |                               |
|                                        | <300ng/mL         | 30                            |
|                                        | ≥300ng/mL         | 14                            |
| <b>CA19-9</b>                          |                   |                               |
|                                        | <20U/ml           | 26                            |
|                                        | ≥20U/ml           | 15                            |
|                                        | Unknow            | 3                             |
| <b>Total bilirubin</b>                 |                   |                               |
|                                        | <21umol/L         | 36                            |
|                                        | ≥21umol/L         | 8                             |
| <b>ALT</b>                             |                   |                               |
|                                        | >50U/L            | 16                            |
|                                        | ≤50U/L            | 28                            |
| <b>AST</b>                             |                   |                               |
|                                        | >50U/L            | 14                            |
|                                        | ≤50U/L            | 30                            |
| <b>GGT</b>                             |                   |                               |
|                                        | >50U/L            | 22                            |
|                                        | ≤50U/L            | 22                            |
| <b>Degree of tumor differentiation</b> |                   |                               |
|                                        | Poorly            | 4                             |
|                                        | Poorly moderately | 9                             |
|                                        | Moderately        | 19                            |
|                                        | Moderately well   | 2                             |
|                                        | Well              | 3                             |
|                                        | Unknow            | 7                             |
| <b>TNM stage</b>                       |                   |                               |
|                                        | Stage I           | 14                            |
|                                        | Stage II          | 8                             |
|                                        | Stage III a       | 2                             |

|                             |             |    |
|-----------------------------|-------------|----|
|                             | Stage III b | 1  |
|                             | Stage III c | 6  |
|                             | Stage IV    | 2  |
|                             | Unknow      | 11 |
| <b>Tumor range</b>          |             |    |
|                             | I           | 14 |
|                             | II          | 10 |
|                             | III         | 3  |
|                             | IV          | 5  |
|                             | Unknow      | 12 |
| <b>Lymphatic metastasis</b> |             |    |
|                             | Yes         | 10 |
|                             | No          | 24 |
|                             | Unknow      | 10 |
| <b>Remote metastasis</b>    |             |    |
|                             | Yes         | 2  |
|                             | No          | 30 |
|                             | Unknow      | 12 |
| <b>Liver cirrhosis</b>      |             |    |
|                             | Yes         | 28 |
|                             | No          | 16 |
| <b>Diabetes</b>             |             |    |
|                             | Yes         | 8  |
|                             | No          | 36 |
| <b>Relapse</b>              |             |    |
|                             | Yes         | 28 |
|                             | No          | 16 |
| <b>Survival status</b>      |             |    |
|                             | Dead        | 19 |
|                             | Living      | 25 |
